# Supplementary material for: Response of atmospheric composition to COVID-19 lockdown measures during Spring in the Paris region (France)
Source: Copernicus journal article supplement (doi:10.5194/acp-2021-369), 2021-05-04
Supplement: Supplementary file 1 [file acp-2021-369-supplement.pdf]

# Response of atmospheric composition to COVID-19 lockdown measures during Spring in the Paris region (France)

Jean-Eudes Petit<sup>1</sup>, Jean-Charles Dupont<sup>2</sup>, Olivier Favez<sup>3</sup>, Valérie Gros<sup>1</sup>, Yunjiang Zhang<sup>1,3</sup>, Jean Sciare<sup>1\*</sup>, Leila Simon<sup>1,3</sup>, François Truong<sup>1</sup>, Nicolas Bonnaire<sup>1</sup>, Tanguy Amodeo<sup>3</sup>, Robert Vautard<sup>1</sup>, Martial Haeffelin<sup>4</sup>

<sup>1</sup>Laboratoire des Sciences du Climat et de l'Environnement, CEA/Orme des Merisiers, Gif-sur-Yvette, France

<sup>2</sup>Institut Pierre Simon Laplace, Ecole Polytechnique, UVSQ, Université Paris-Saclay, Palaiseau, France

<sup>3</sup>Institut National de l'Environnement Industriel et des Risques, Parc Technologique ALATA, Verneuil en Halatte, France

<sup>4</sup>Institut Pierre Simon Laplace, Ecole Polytechnique, CNRS, Université Paris-Saclay, Palaiseau, France

\* Now at Cyprus Institute, Nicosia, Cyprus

Correspondence to: Jean-Eudes Petit (jean-eudes.petit@lsce.ipsl.fr)

## Supplementary material

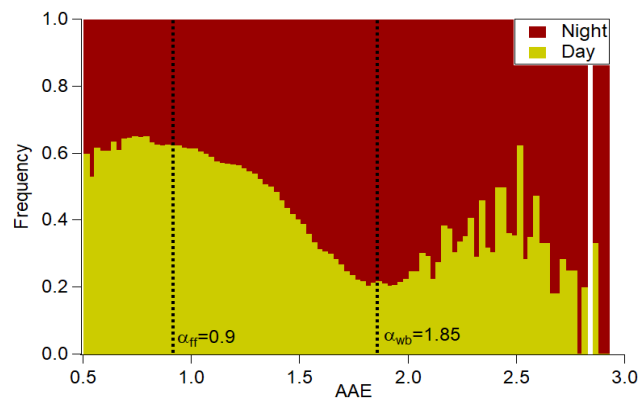

Figure S1 Diurnal variations of AAE between night and day hours. Night and day were defined as UTC 18h00–5h00 and 6h00–17h00, respectively.

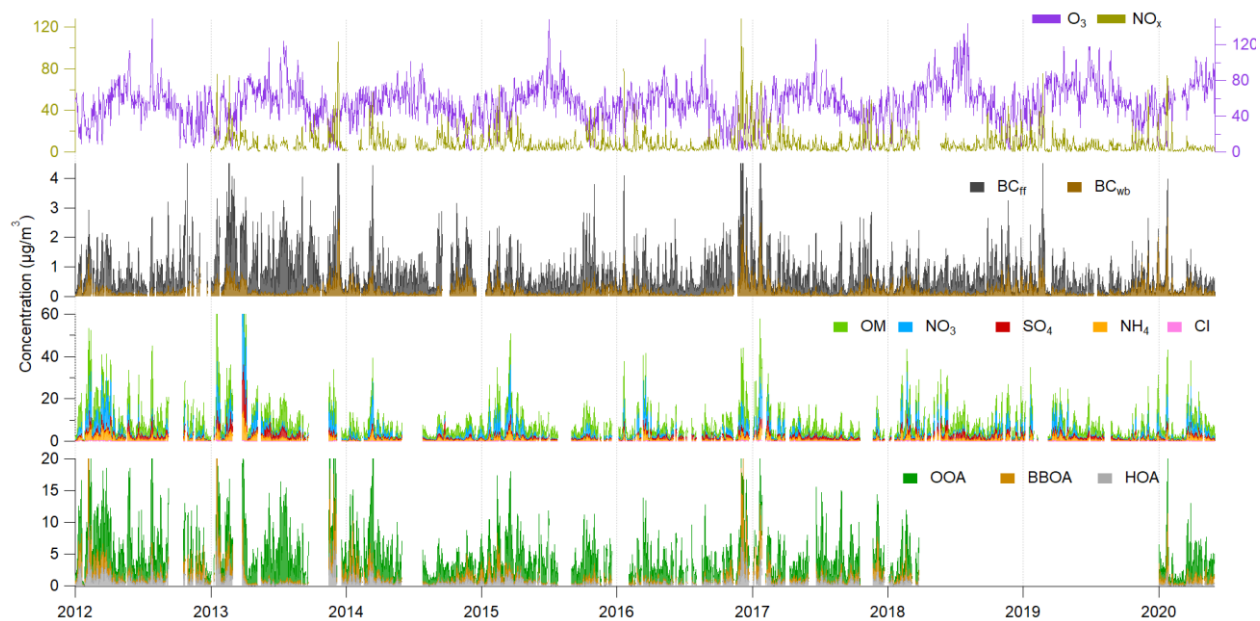

**Figure S2 Concentration timeseries (daily average,  $\mu\text{g}/\text{m}^3$ ) of the in-situ dataset used in this study.**

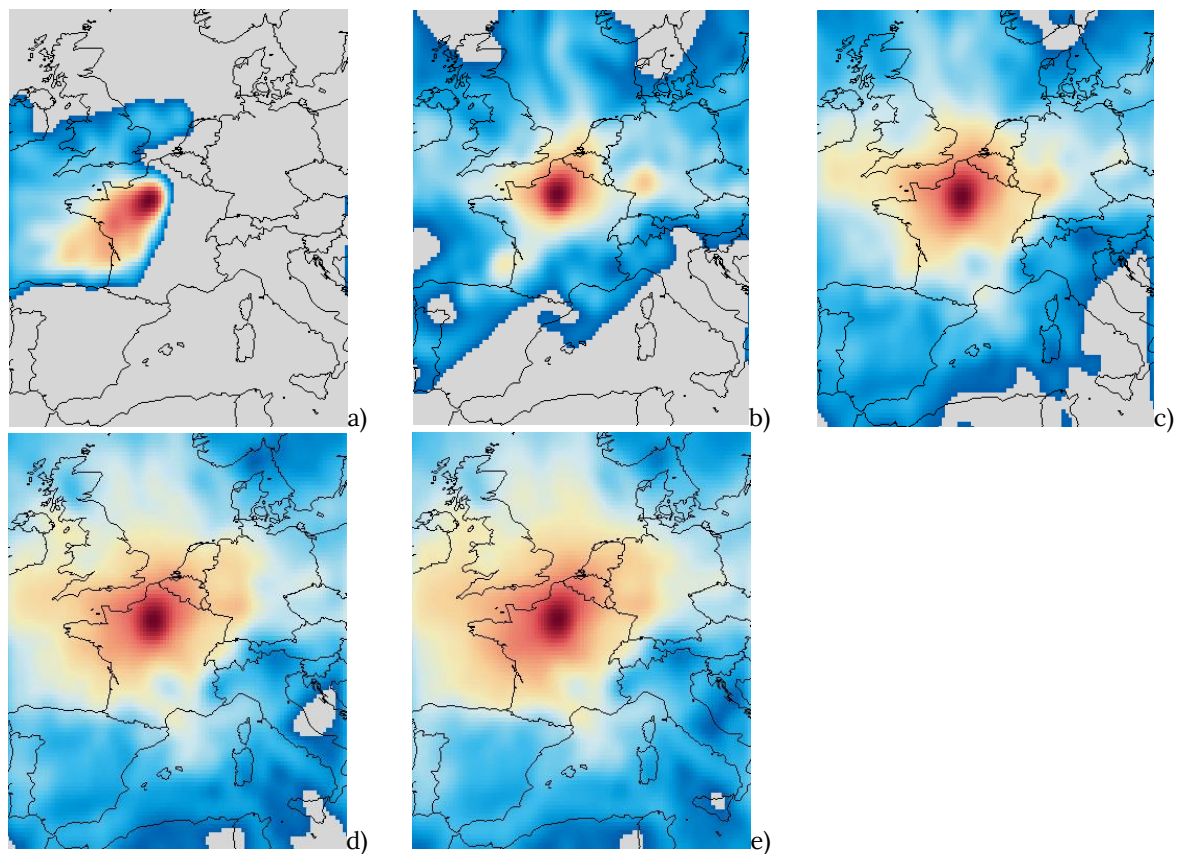

**Figure S3 Air mass origin during pLP2020(a), LP2019(b), LP2017-2019(c), LP2015-2019(d) and LP2012-2019(e), represented as trajectory density.**

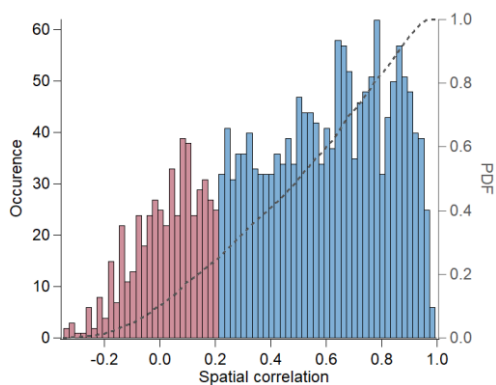

**Figure S4: Distribution of spatial correlation between each day of LP2020 and each corresponding analog day. Red bars correspond to non-satisfactory analogs.**

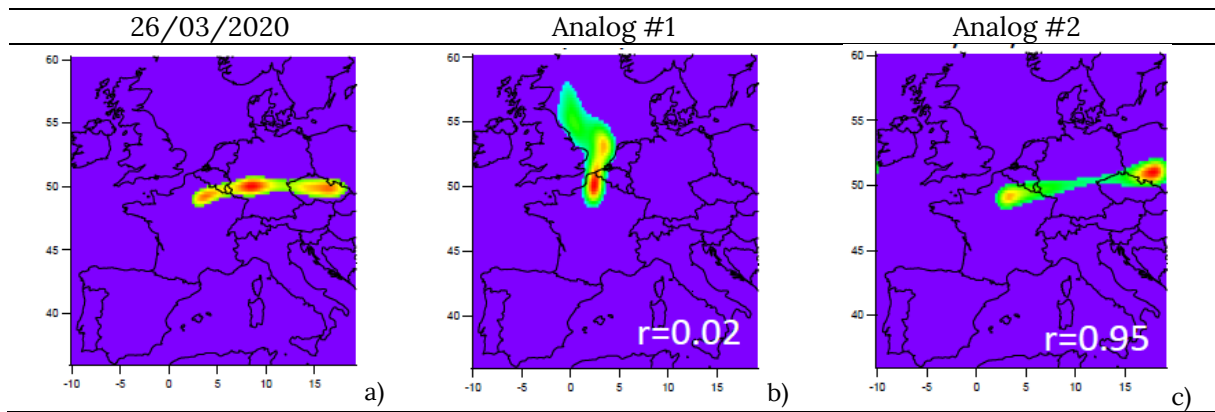

**Figure S5 Origin of air masses arriving at SIRTA. a) on March, 26<sup>th</sup> 2020; b) for one analog day from synoptic circulation analysis; c) for another day of the analog list. Pearson correlation coefficients are shown on the plot**

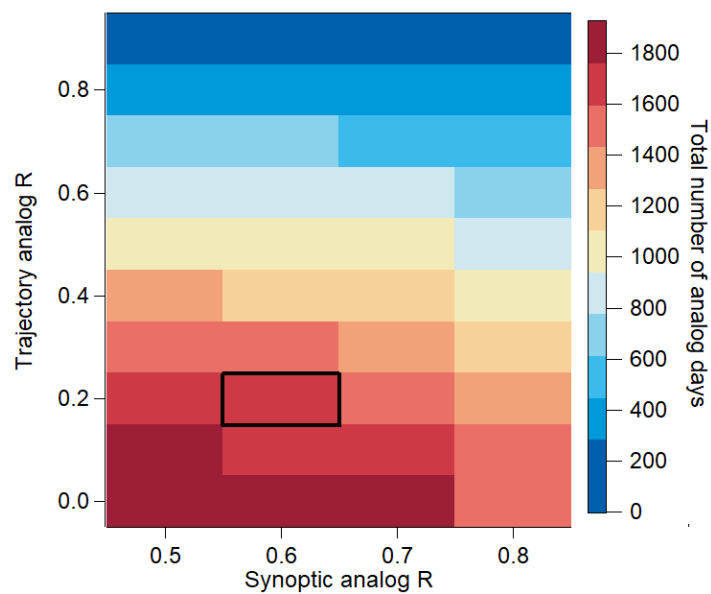

**Figure S6 Influence of correlation coefficients on the total number of analog days. Black box corresponds to the scenario used in the main text.**

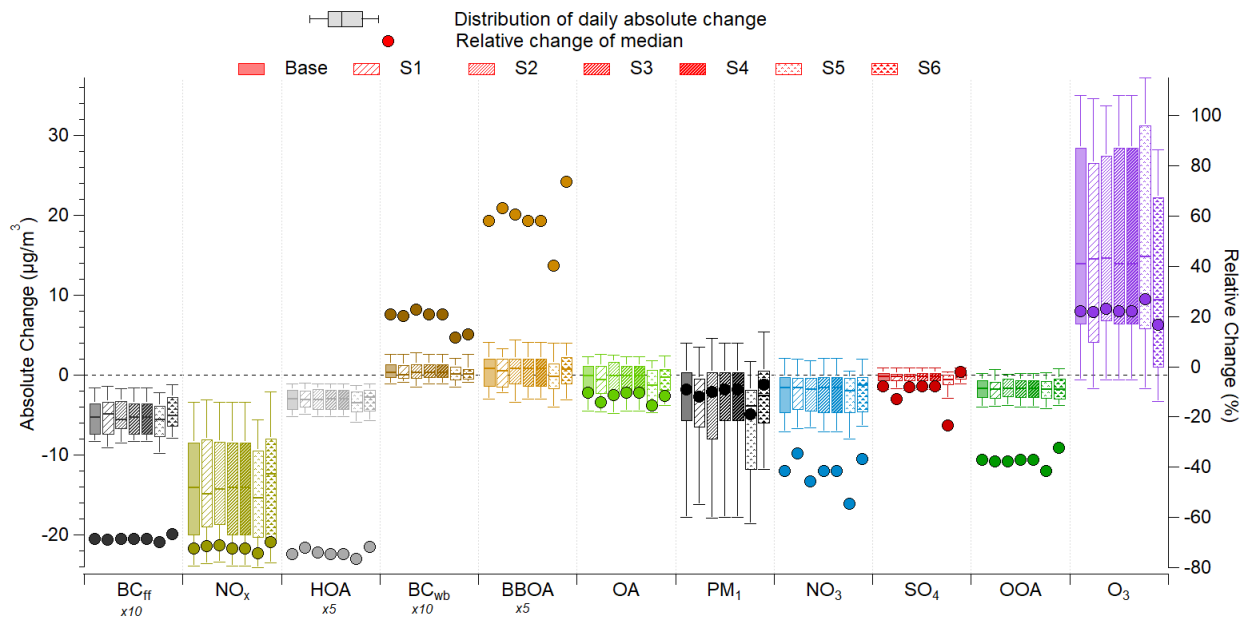

**Figure S7 Absolute and relative changes of ambient concentrations of reactive gases and particulate pollutants due to lockdown, calculated for different analog scenarios (Table 2). Left axis: Boxplots represent the distribution of daily absolute change ( $\mu\text{g}/\text{m}^3$ ); 10<sup>th</sup>, 25<sup>th</sup>, 50<sup>th</sup>, 75<sup>th</sup> and 90<sup>th</sup> percentiles were used. BC<sub>ff</sub>, HOA, BC<sub>wb</sub> and BBOA concentration changes have been scaled for clarity. Right axis: Round markers refer to the relative change (%) of median concentrations.**

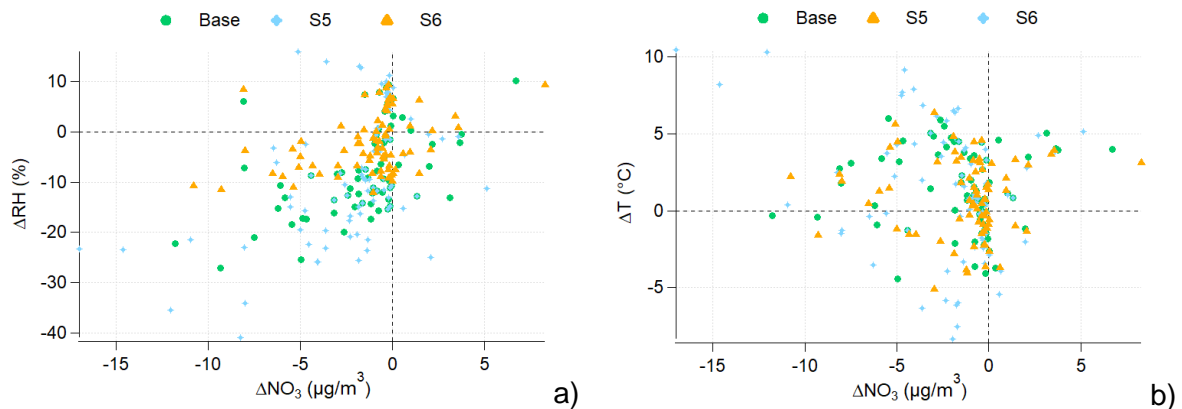

**Figure S8 Influence of meteorological filtering on the concentration change of NO<sub>3</sub>. Daily concentration change of NO<sub>3</sub> versus RH (a) and temperature (b) change for Base, S5 and S6 scenarios.**

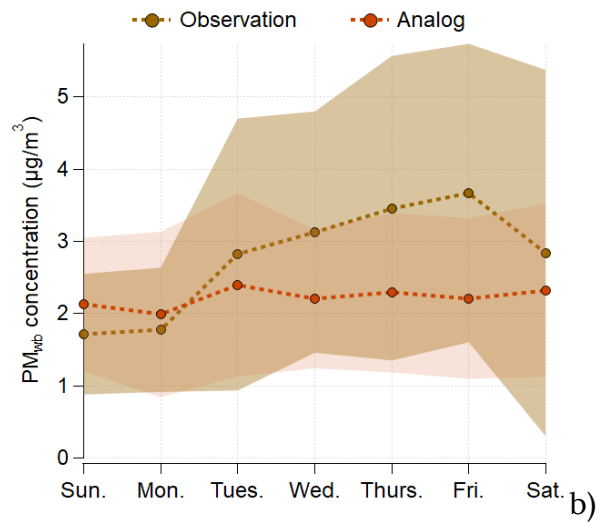

**Figure S9 Weekly variations of PM<sub>wb</sub> during lockdown (mean ± standard deviation) for the observed (brown) and analog (dark red) dataset.**

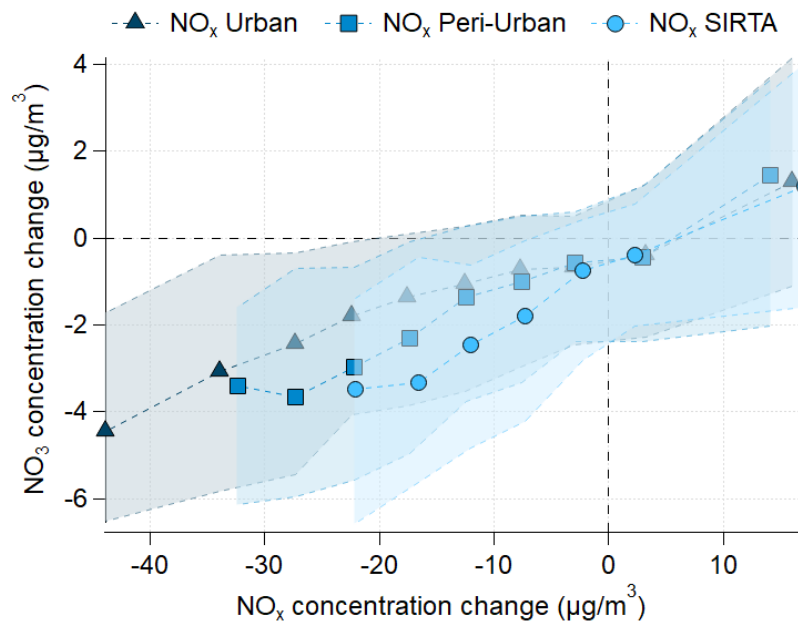

**Figure S10 Concentration change of NO<sub>3</sub> vs concentration NO<sub>x</sub> at different backgrounds (Sirta, urban and peri-urban).**
